# Supplementary material
Source: MDPI journal article supplement (https://www.mdpi.com/2227-9717/9/11/1899)
Supplement: s1 [file s1]

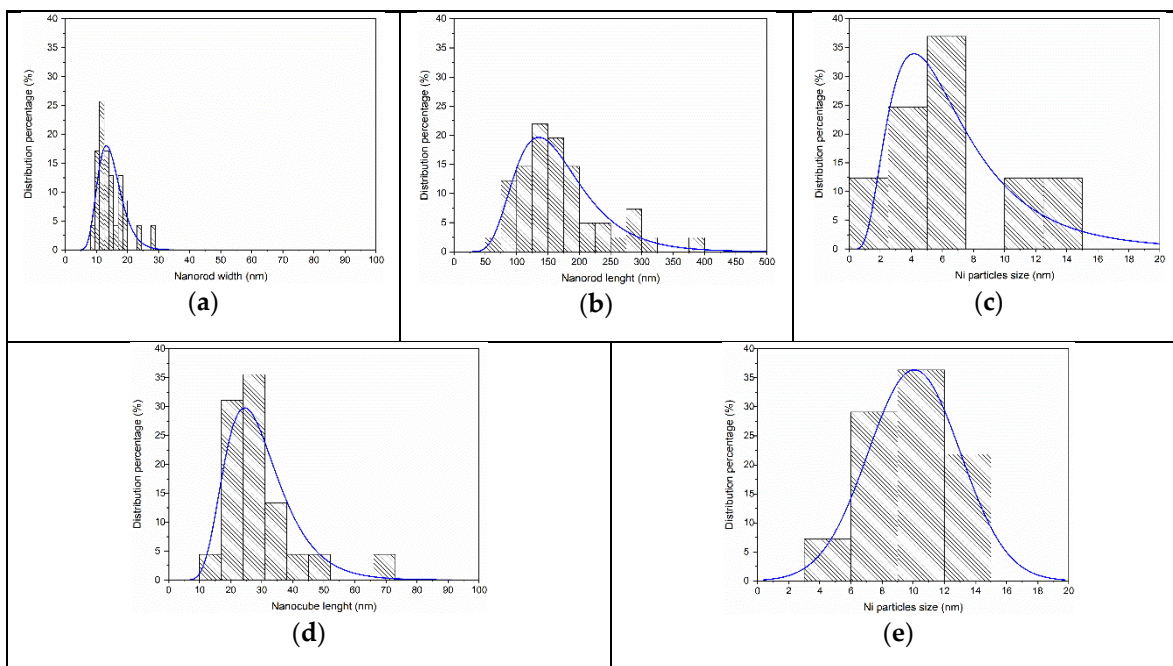

**Figure S1:** Average size distribution: Ni-nR CeO<sub>2</sub> oxide width (a), Ni-nR CeO<sub>2</sub> oxide length (b), Ni-nR Ni oxide particles (c), oxide width of CeO<sub>2</sub> in the Ni-nC (d), Ni oxide particles in the Ni-nC (e).
